# Supplementary material for: Dissecting super-enhancer driven transcriptional dependencies reveals novel therapeutic strategies and targets for group 3 subtype medulloblastoma
Source: J Exp Clin Cancer Res. 2022 Oct 22;41:311. doi: 10.1186/s13046-022-02506-y (PMC9587669; doi:10.1186/s13046-022-02506-y)
Supplement: Supplementary file 2 — Additional file 2: Supplementary Table S2 [file 13046_2022_2506_MOESM2_ESM.xlsx]

## Sheet: Sheet1
Antibody	Company	Catalog No.
P-Rpb1-Ser5	CST	13523S
MYC	CST	5605S
OTX2	proteintech	13497-1-AP
TUBB	abcam	ab6046
