# Supplementary material for: Dissecting super-enhancer driven transcriptional dependencies reveals novel therapeutic strategies and targets for group 3 subtype medulloblastoma
Source: J Exp Clin Cancer Res. 2022 Oct 22;41:311. doi: 10.1186/s13046-022-02506-y (PMC9587669; doi:10.1186/s13046-022-02506-y)
Supplement: Supplementary file 4 — Additional file 4: Supplementary Table S4 [file 13046_2022_2506_MOESM4_ESM.xlsx]

## Sheet: Sheet1
		Forward Sequence (5'-3')	Reverse Sequence (5'-3')
ARL4D	ARL4D-1	TGTCCTTTTGGTCACACTGC	GAGGGGCACAGGAATGAGTA
	ARL4D-2	ACCAGGTGGCTGGTTTTGTA	ACCCTCCTCAATCAAGTGCTG
	ARL4D-3	GCACTGAAGGCTGACTAGGG	GCACATCAAGGGAACCAGAT
	ARL4D-4	GGGCAGGTGTCAAAGAAGAG	CTCAGTTCAGACCAGCCACA
	ARL4D-5	CAAGGGCTCAAGGAAGACAG	CACTGCTAAGTGGCCGTGTA
	ARL4D-6	GGCAAGCCTTCTGAGAGAGA	CAATAGCTTGACCCCCAAGA
	ARL4D-7	GCTGTGTGATTGGTGTCAGG	GCTGGGAAATTCCATGCTTA
	ARL4D-8	CGAGAAGGTTCCCTGATGAA	AGAGCCTGCCAGAATCAGAA
PSMB5	PSMB5-1	CTGTGATCCTGCCTCACTCA	AGAAGGTTTGGGCTCTCACA
	PSMB5-2	CAACTGCAAAGGGGACATTT	GTGGCTTCAGAGCCAAGTTC
	PSMB5-3	TCTGATGGGAGTCCCTGAAC	CTTTGCAGCGATGTGTGTCT
	PSMB5-4	TTCAGGCATTGGGATTTCTC	TGCGTGAGAAGCACAGGTAG
	PSMB5-5	CCCTCCACACATATGCACTG	GGAAGGGGAGGACAAAGAAG
	PSMB5-6	TACATCCAGGACAACCACCA	CAGTCAAATGCGGAAGGAGT
	PSMB5-7	CCAGGCCAACTGCCTTTAT	GGTGTTGCACAAAACAACCA
